# Supplementary material for: Improving performance of luminescent nanothermometers based on non-thermally and thermally coupled levels of lanthanides by modulating laser power
Source: Royal Society of Chemistry journal article supplement (doi:10.1039/d1nr01395e), 2021-01-01
Supplement: d1nr01395e1.pdf [file d1nr01395e1.pdf]

Supporting Information for:

**Improving performance of luminescent nanothermometers based on non-thermally and thermally coupled levels of lanthanides by modulating laser power**

Natalia Stopikowska, Marcin Runowski\*, Małgorzata Skwierczyńska, Stefan Lis

*Adam Mickiewicz University, Faculty of Chemistry, Uniwersytetu Poznańskiego 8, 61-614  
Poznań, Poland*

**\*Corresponding Author**

E-mail: [runowski@amu.edu.pl](mailto:runowski@amu.edu.pl)

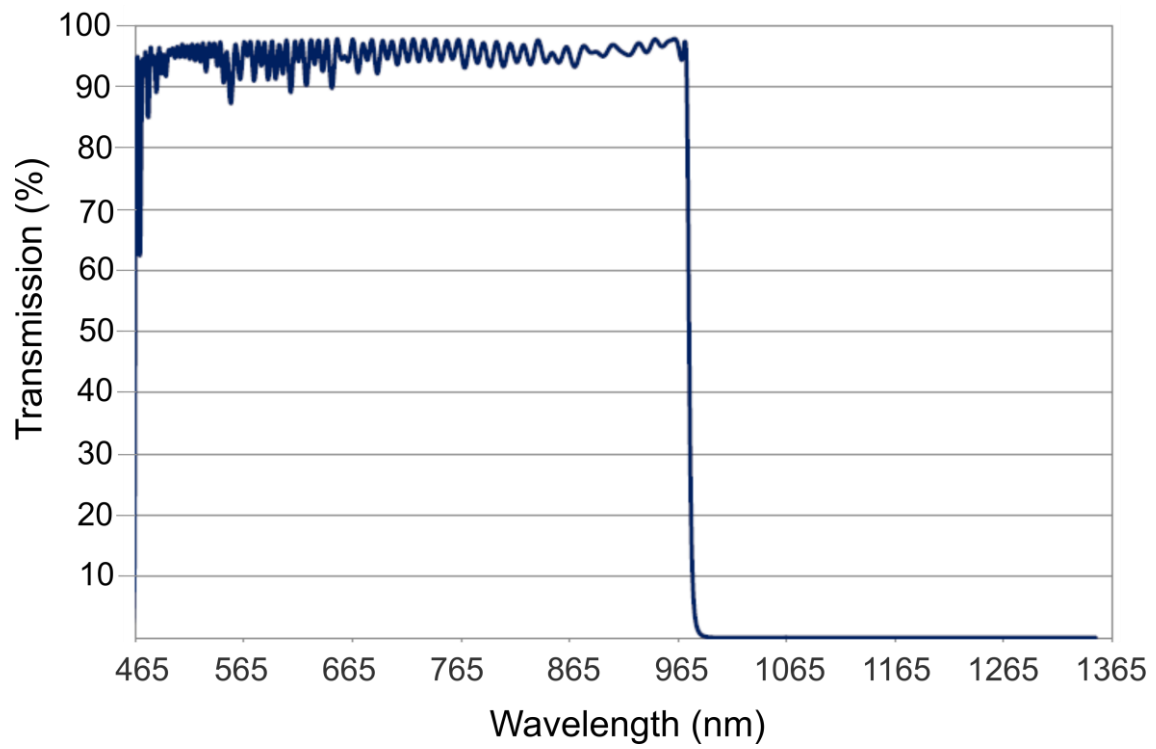

**Figure S1.** Transmission data for the optical filter used, i.e. short-pass 950 nm.

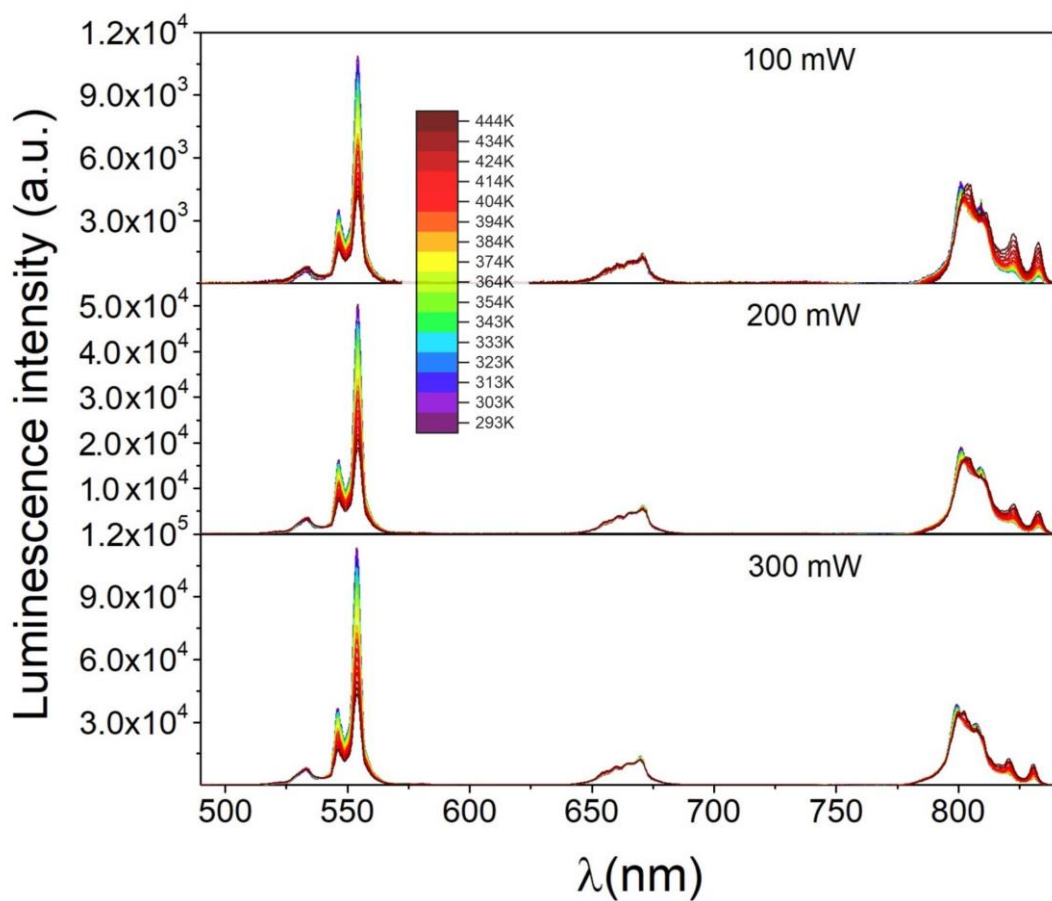

**Figure S2.** Non-normalized up-conversion emission spectra for the sample  $\text{YVO}_4: \text{Yb}^{3+}, \text{Er}^{3+}$ , measured at increasing temperature values, and with different laser power (100, 200 and 300 mW);  $\lambda_{\text{ex}} = 975$  nm.

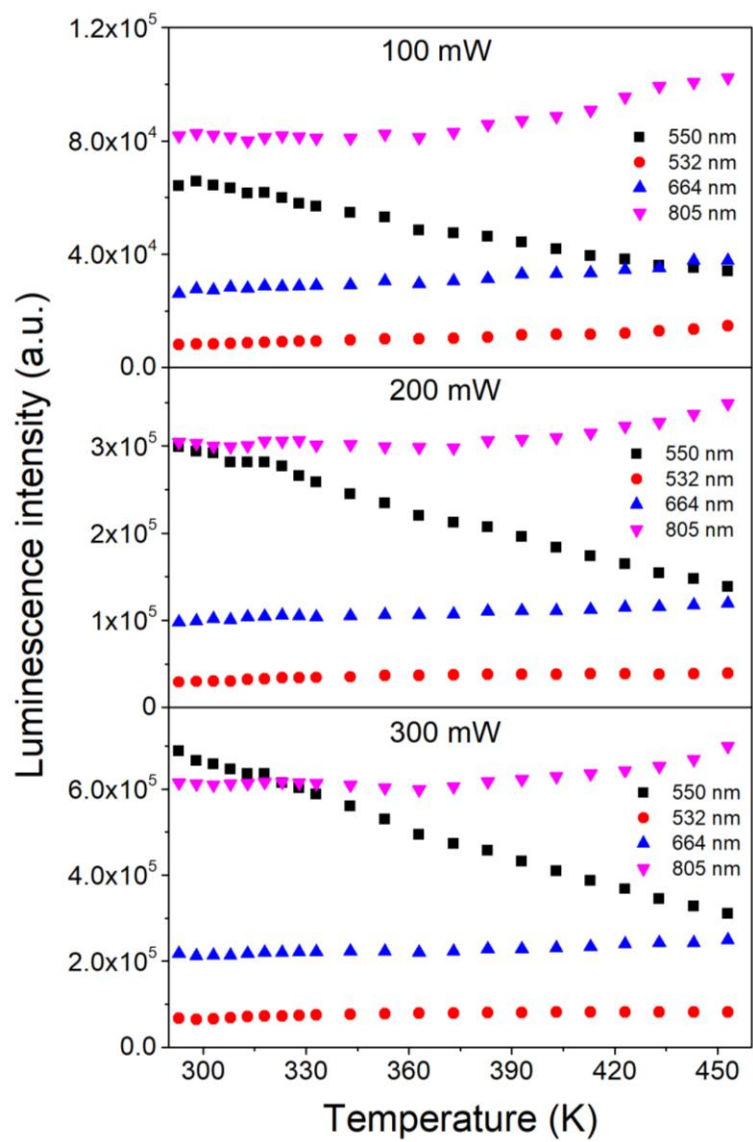

**Figure S3.** Integrated up-conversion luminescence intensities as a function of temperature.

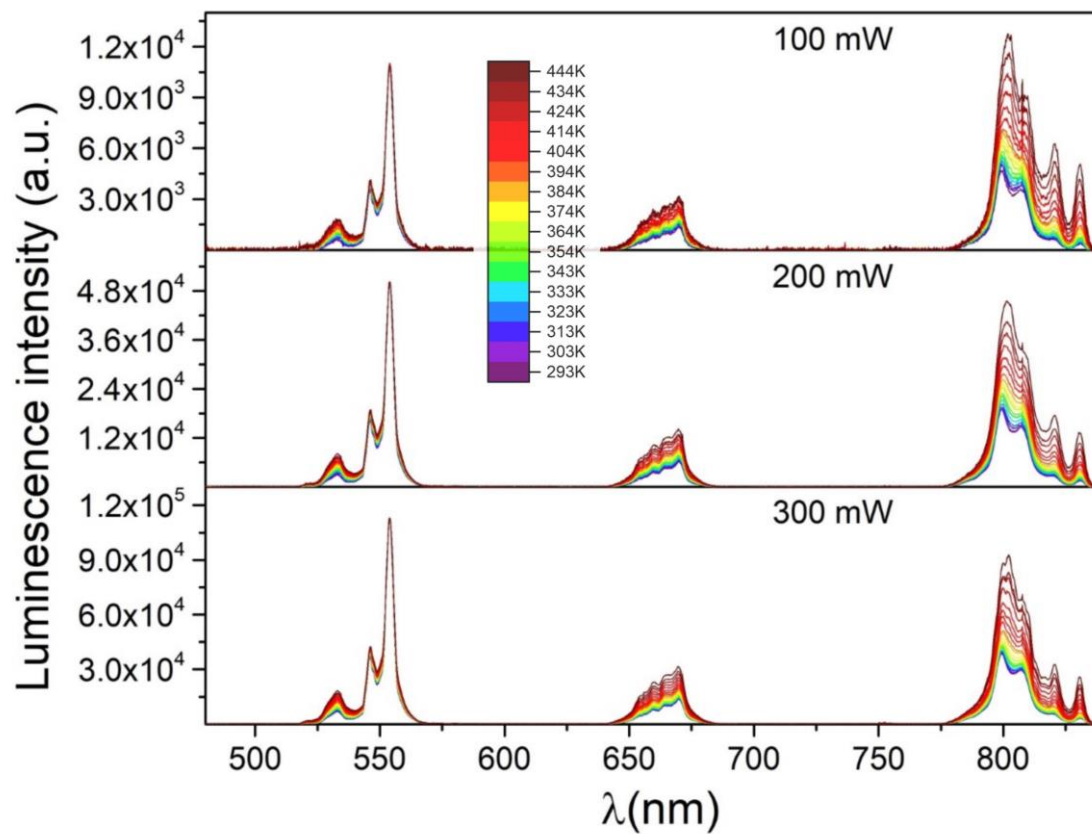

**Figure S4.** Normalized up-conversion emission spectra for the sample  $\text{YVO}_4: \text{Yb}^{3+}, \text{Er}^{3+}$ , measured at increasing temperature values, and with different laser power (100, 200 and 300 mW);  $\lambda_{\text{ex}} = 975 \text{ nm}$ ; all spectra are normalized to the band centered around 550 nm.

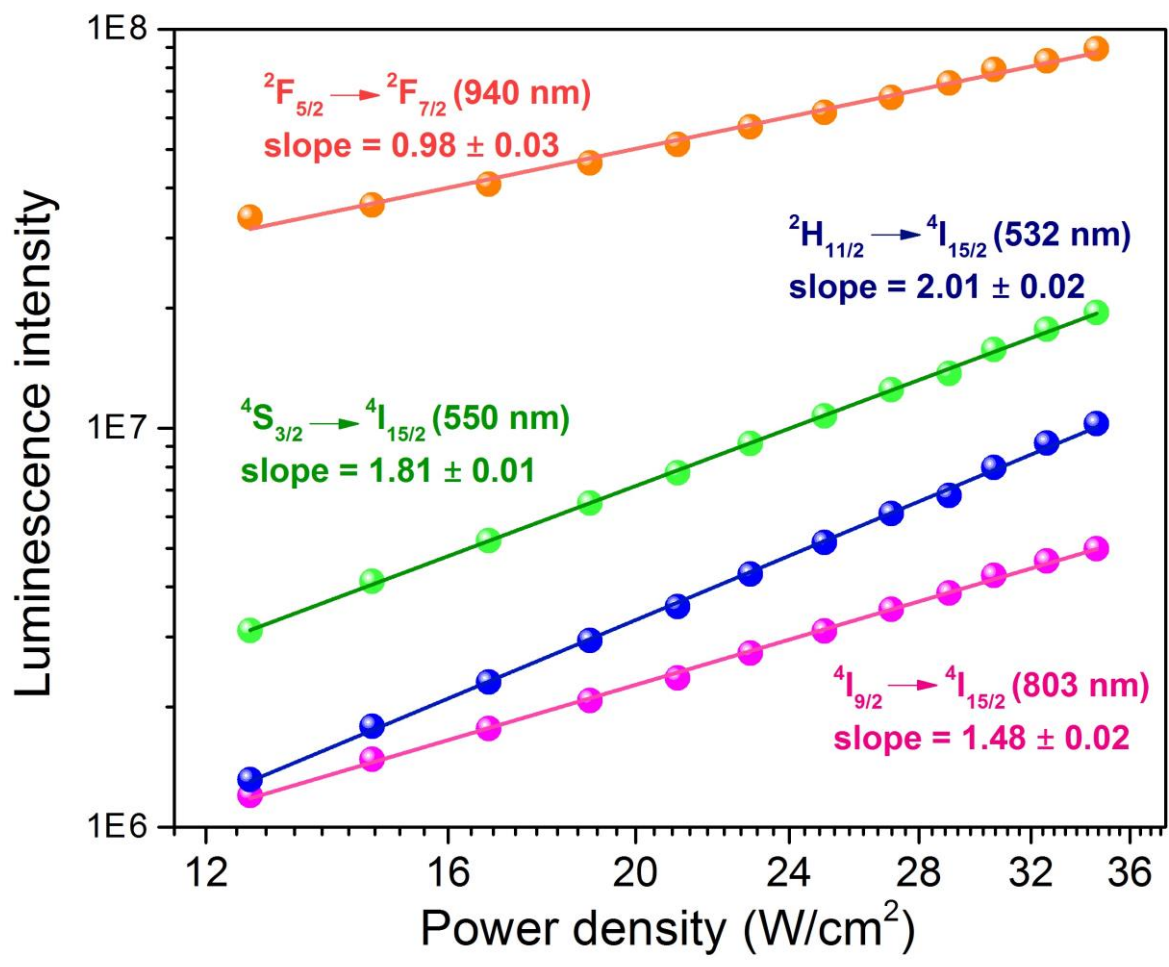

**Figure S5.** The log-log dependence of the luminescence intensity on the pump power for the sample YVO<sub>4</sub>: Yb<sup>3+</sup>, Er<sup>3+</sup>;  $\lambda_{\text{ex}} = 975$  nm.

According to Brites et al. (C. D. S. Brites, A. Millán and L. D. Carlos. *Lanthanides in Luminescent Thermometry, in Handbook on the Physics and Chemistry of Rare Earths, 2016, vol. 49, pp. 339–427*) temperature resolution  $\delta T$  (also known as temperature uncertainty) is the smallest change of temperature that gives a detectable change of the measured signal (spectroscopic parameter). Due to the fact that temperature resolution parameter,  $\delta T$  is exclusively associated with changes in LIR values, temperature uncertainty can be expressed by the Taylor's series expansion of the temperature variation with LIR, namely:

$$\delta T = \frac{\partial T}{\partial LIR} \delta LIR + \frac{1}{2!} \frac{\partial^2 T}{\partial LIR^2} (\delta LIR)^2 + \dots + \frac{1}{n!} \frac{\partial^n T}{\partial LIR^n} (\delta LIR)^n \quad (1)$$

where  $\delta LIR$  is the uncertainty in the determination of luminescence intensity ratio (LIR). Assuming the expansion in  $T$  is dominated by the first part of the Eq. 1 (Baker, S.N., McCleskey, T.M., Baker, G.A., 2005. *An ionic liquid-based optical thermometer. Ionic liquids IIIB: Fundamentals, Progress, Challenges and Opportunities, vol. 902. American Chemical Society, Washington, DC171 – 181, Chapter 14*), it can be expressed in terms of relative sensitivity ( $S_r$ ):

$$\delta T = \frac{1}{S_r} \frac{\delta LIR}{LIR} \quad (2)$$

Please note, that  $\delta T$  depends on two factors, namely: I) the performance of the thermometer, expressed as the relative sensitivity; and II) the experimental setup (that obviously limits  $\delta LIR/LIR$ ).

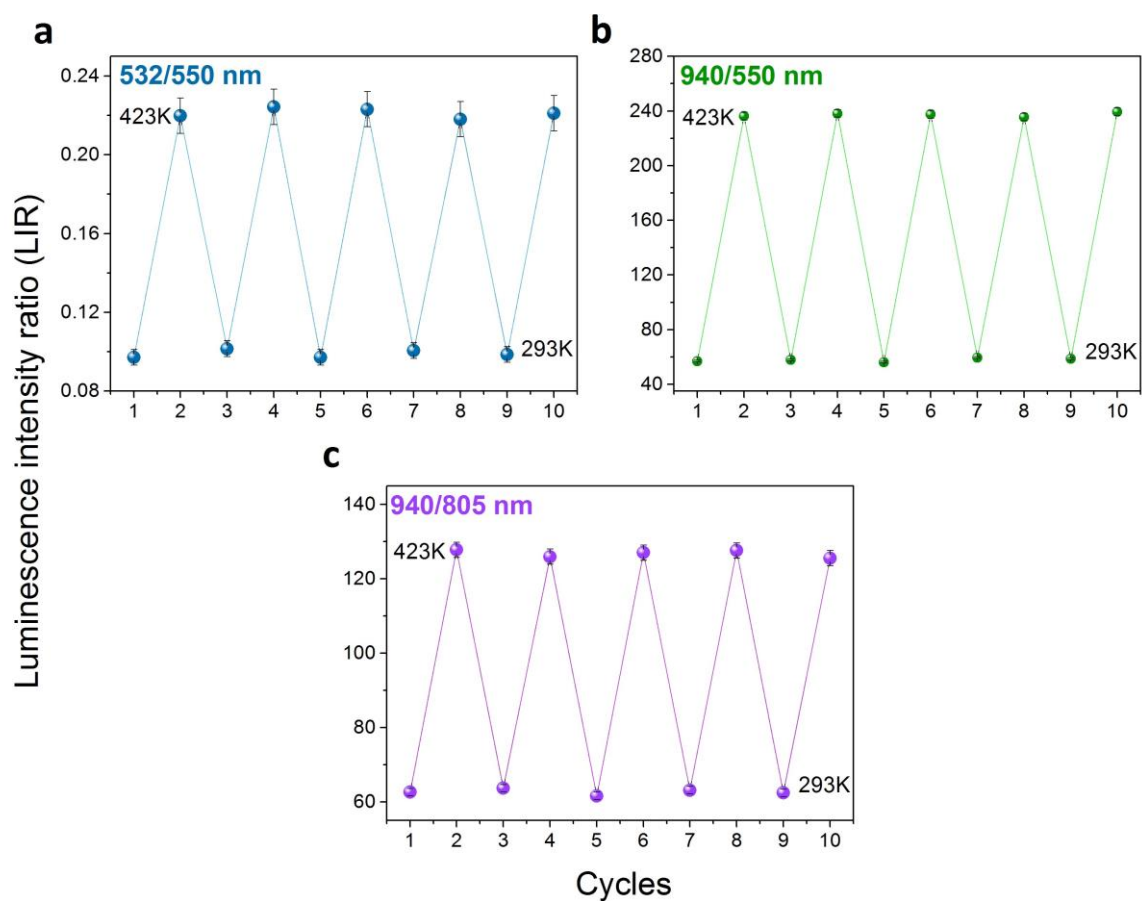

**Figure S6.** Thermal cycling of the YVO<sub>4</sub>: Yb<sup>3+</sup>, Er<sup>3+</sup> sample between the low (293 K) and high (423 K) temperatures, for the determined thermometric parameters, i.e. a) 532/550 nm, b) 935/550 nm and c) 935/805 nm band intensity ratios;  $\lambda_{\text{ex}} = 975 \text{ nm}$  (300 mW).
